# Supplementary material
Source: PubMed Central journal article supplement (PMC6080108)
Supplement: Supp_Figure1.pdf [file Supp_Figure1.pdf]

## Supplementary Data

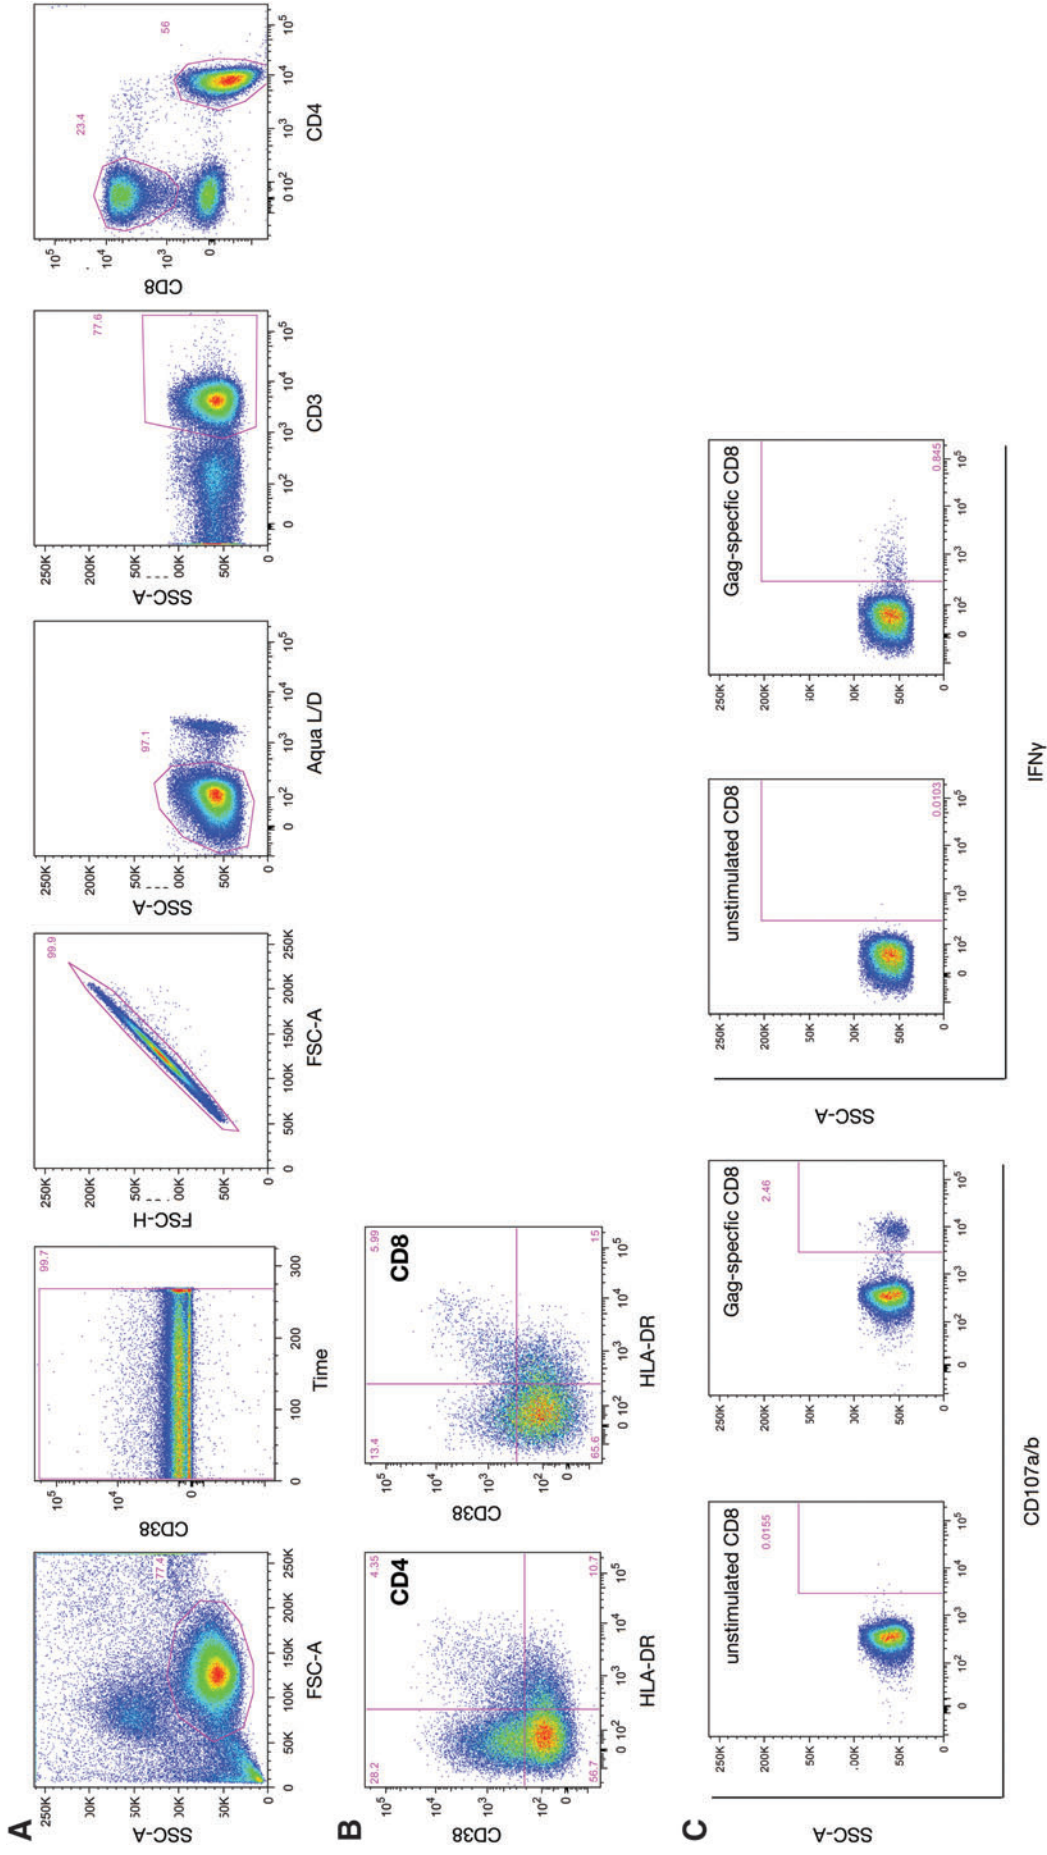

**SUPPLEMENTARY FIG. S1.** (A) Gating strategy to identify CD4<sup>+</sup> and CD8<sup>+</sup> T cells. (B) Activated CD4<sup>+</sup> and CD8<sup>+</sup> T cells were then identified by the expression of HLA-DR and CD38. (C) The frequency of HIV-specific CD4<sup>+</sup> and CD8<sup>+</sup> T cells was determined by the expression of CD107a/b and IFN $\gamma$  upon stimulation, here examples shown as the frequency of Gag-specific CD8<sup>+</sup> T cells. Frequency of activated CD4<sup>+</sup> and CD8<sup>+</sup> T cells (B) and HIV-specific CD4<sup>+</sup> and CD8<sup>+</sup> T cells (C) was gated on total CD4<sup>+</sup> and CD8<sup>+</sup> T cells, respectively.
