# Supplementary material
Source: PubMed Central journal article supplement (PMC6080108)
Supplement: Supp_Table1.pdf [file Supp_Table1.pdf]

SUPPLEMENTARY TABLE S1. CLINICAL, IMMUNOLOGICAL, AND VIROLOGICAL BASELINE CHARACTERISTICS AND DEMOGRAPHICS OF CHRONICALLY HIV-INFECTED STUDY PARTICIPANTS

| <i>Characteristics</i>                                                 | <i>Cognitively normal (NL)</i><br>(n=23) | <i>Cognitively impaired (HAND)</i><br>(n=27) |
|------------------------------------------------------------------------|------------------------------------------|----------------------------------------------|
| Median age (range), years                                              | 36 (25 to 48)                            | 35 (22 to 54)                                |
| Gender, male:female                                                    | 10:13                                    | 10:17                                        |
| Neurological diagnosis at baseline, <i>n</i> (%)                       |                                          |                                              |
| NL                                                                     | 23 (100)                                 | NA                                           |
| HAND                                                                   | NA                                       | 27 (100)                                     |
| Neurological diagnosis at 12 months, <i>n</i> (%)                      |                                          |                                              |
| NL                                                                     | 23 (100)                                 | 8 (30)                                       |
| HAND                                                                   | NA                                       | 19 (70)                                      |
| Median plasma HIV RNA at baseline (range), log <sub>10</sub> copies/mL | 4.7 (3.1 to 5.9)                         | 4.8 (3.3 to 5.9)                             |
| Subjects not controlling HIV RNA at 12 months, <i>n</i> (%)            | 1 (4)                                    | 4 (15)                                       |
| Median CD4 count at baseline (range), cell/mm <sup>3</sup>             | 191 (19 to 343)                          | 182 (14 to 304)                              |
| Median CD4 count at 12 months (range), cell/mm <sup>3</sup>            | 393 (130 to 849)                         | 356 (5 to 768)                               |
| NPZ <sub>global</sub> score at baseline (range)                        | 0.12 (-0.45 to 1.10)                     | -0.71 (-2.6 to 0.06)                         |
| NPZ <sub>global</sub> score at 12 months (range)                       | 0.35 (-0.33 to 1.14)                     | -0.86 (-2.3 to 0.01)                         |

HAND, HIV-associated neurocognitive disorders; NA, not applicable; NL, cognitively normal.
